# Supplementary material for: Screening and Identifying m6A Regulators as an Independent Prognostic Biomarker in Pancreatic Cancer Based on The Cancer Genome Atlas Database
Source: Hindawi journal article supplement (doi:10.1155/2021/5573628), 2021-01-01

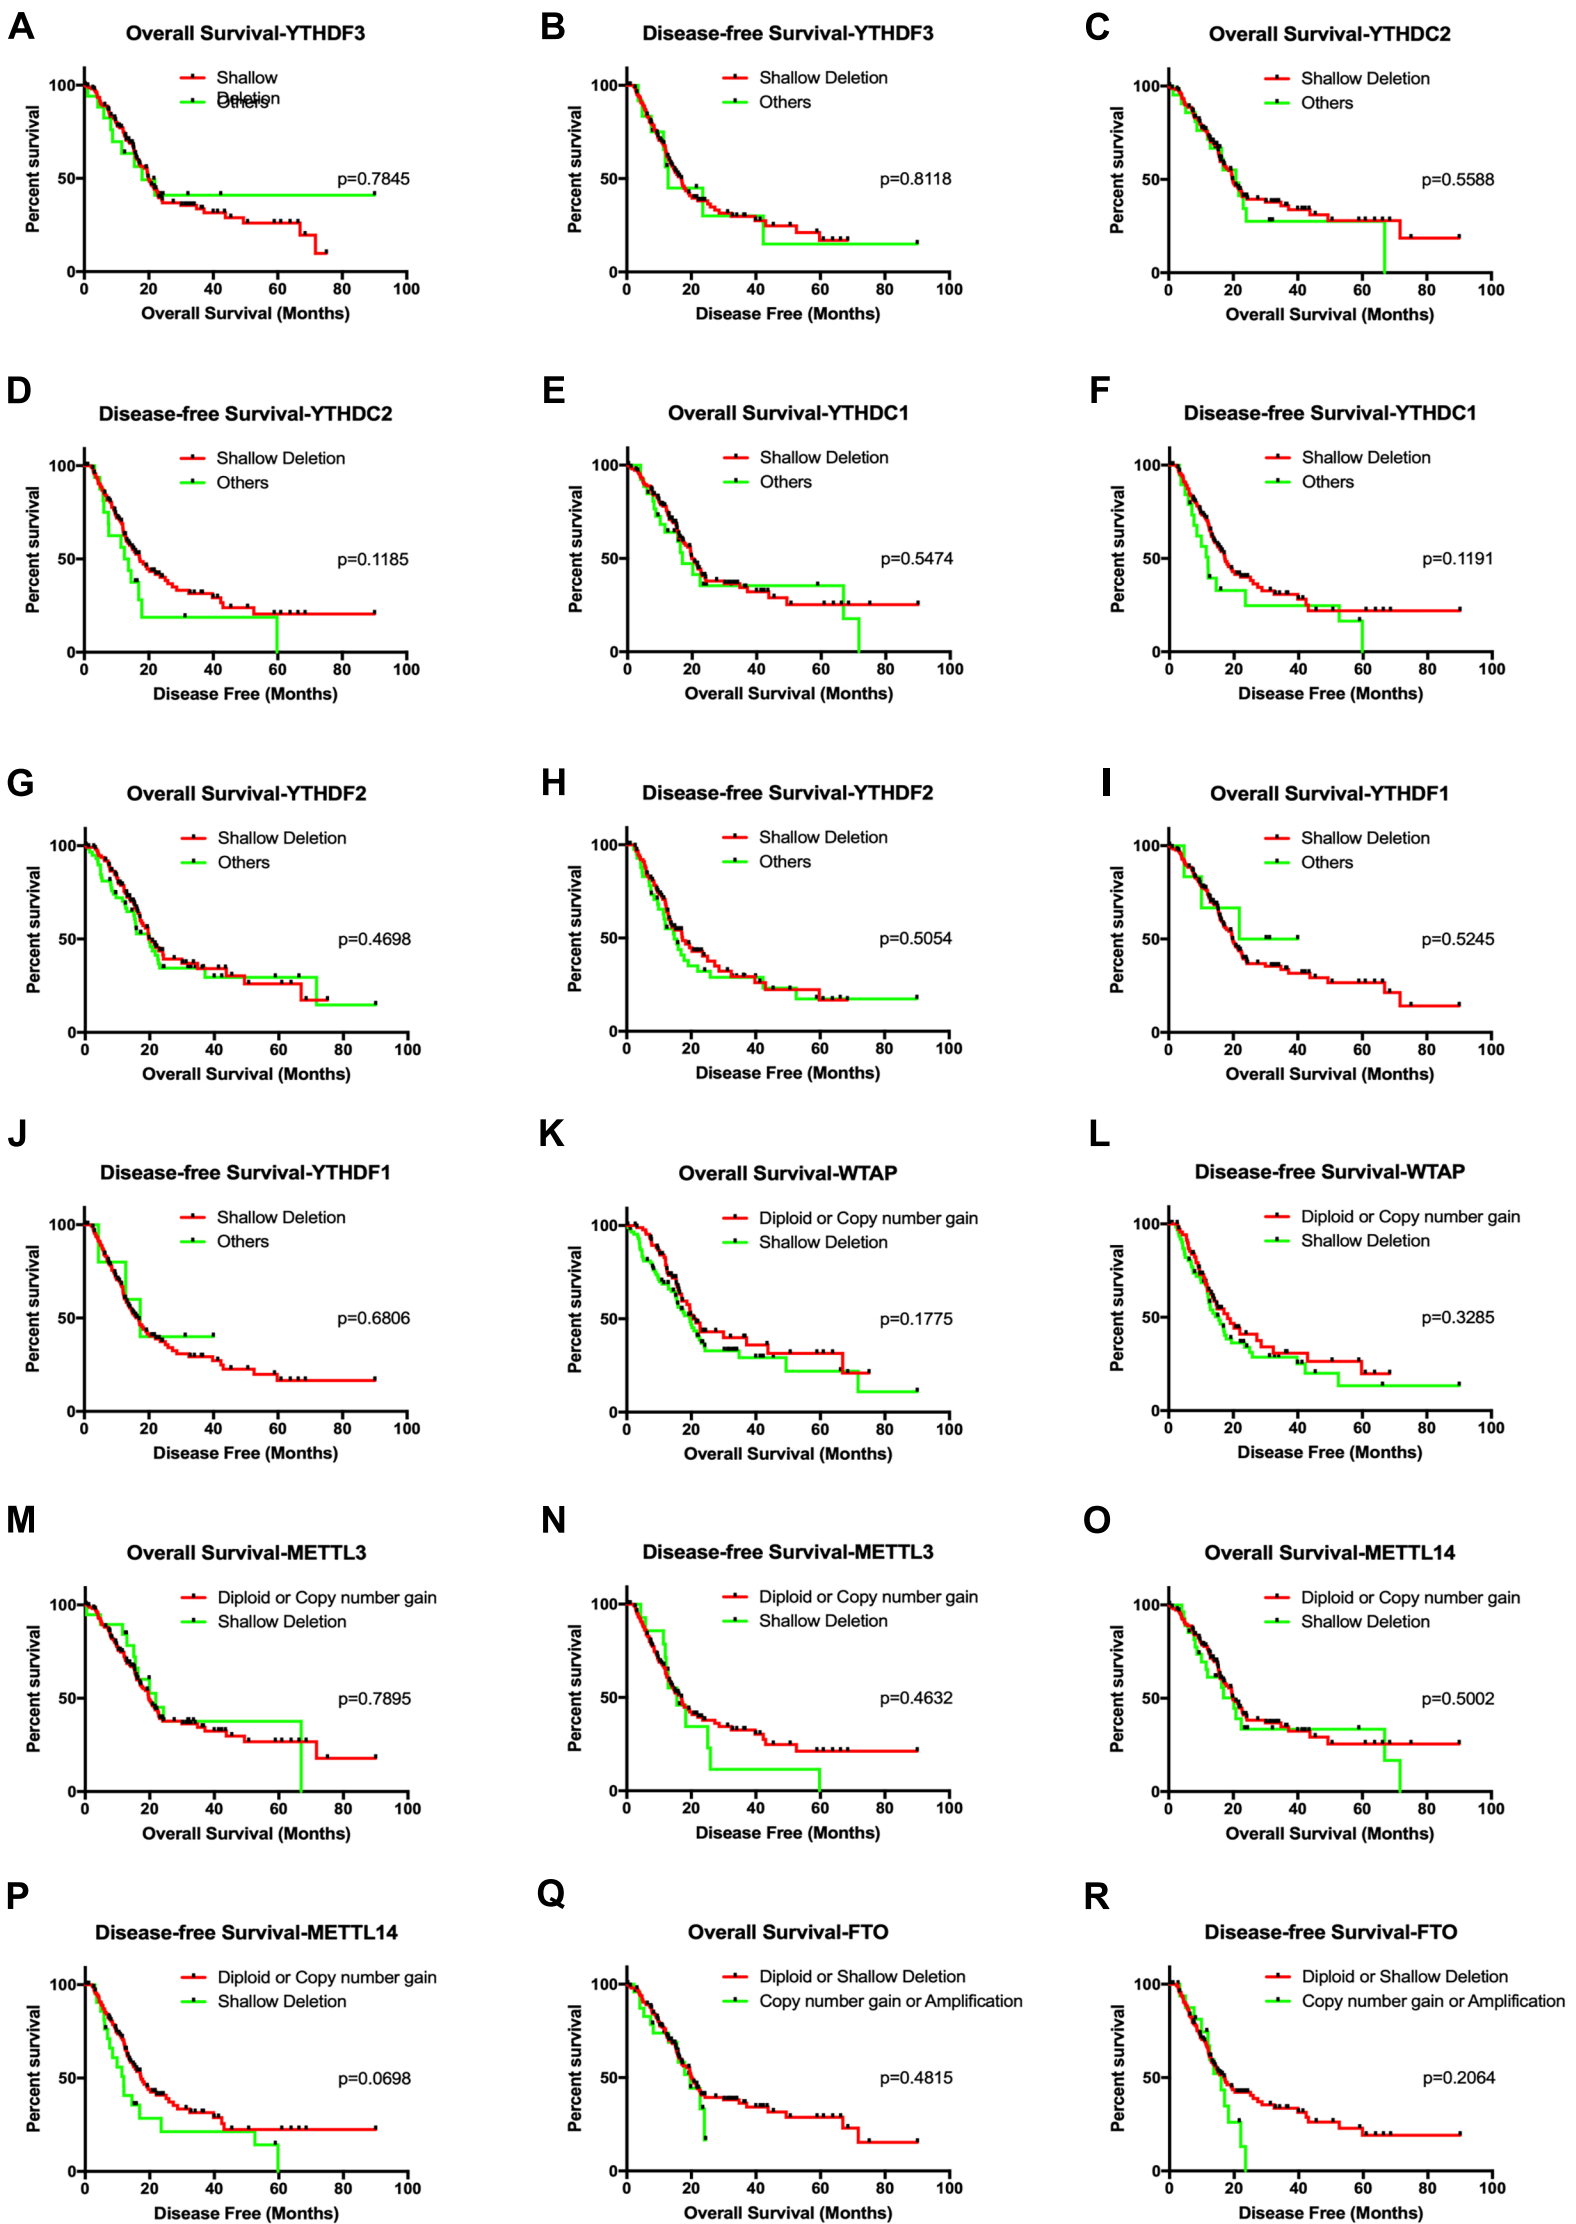

Supplement: f1 [file 5573628.f1.pdf]
